# Supplementary material
Source: PubMed Central journal article supplement (PMC2781441)
Supplement: supp_M109.050674_jbc.M109.050674-1.pdf [file supp_M109.050674_jbc.M109.050674-1.pdf]

Supplemental table 1

Sequences of all primers used in the study

| <b>primer</b> | <b>sequence (5' - 3')</b>                                                   |
|---------------|-----------------------------------------------------------------------------|
| DV4498        | cccagtttgcaggttaccag                                                        |
| DV4503        | taggagcccccaatgatgag                                                        |
| DV5019        | acccaaatattcgagcaaatcc                                                      |
| DV5020        | ggagctttgatgtccgagag                                                        |
| DV5049        | cttgccttttttgcagattcagaaaagagactccgttgtttcc                                 |
| DV5050        | gggctttggatgatcatcatgcccttcacttaactagtgaagggttgagg                          |
| DV5094        | ccaggctggaatgcaatgg                                                         |
| DV5110        | atagttgttacgtgttgattgc                                                      |
| DV5111        | gcagattcactgagttcaaagccttttatagagacacattagttacaggtaaagtaggtgagaattgaaaatacg |
| DV5112        | gattttcaaagcagcagaaaatggttcgtattttcaattcttcacctactacctgtaactaatgtgtctct     |
| DV5114        | attgaccttaacatctagtaagg                                                     |
| DV5115        | cactggagagagagctccg                                                         |
